# Supplementary material for: Crystal Structure and Biochemical Analysis of a Cytochrome P450 CYP101D5 from Sphingomonas echinoides
Source: MDPI journal article supplement (doi:10.3390/ijms232113317), 2022-11-01

## Supplementary Material on

### Crystal structure and biochemical analysis of a cytochrome P450 CYP101D5 from *Sphingomonas echinoides*

Pradeep Subedi<sup>1,†</sup>, Hackwon Do<sup>2,3,†</sup>, Jun Hyuck Lee<sup>2,3,\*</sup>, and Tae-Jin Oh<sup>1,4,5,\*</sup>

<sup>1</sup> Department of Life Science and Biochemical Engineering, Graduate School, Sun Moon University, Asan 31460, Korea

<sup>2</sup> Research Unit of Cryogenic Novel Material, Korea Polar Research Institute, Incheon 21990, Korea

<sup>3</sup> Department of Polar Sciences, University of Science and Technology, Incheon 21990, Korea

<sup>4</sup> Genome-based BioIT Convergence Institute, Asan 31460, Korea

<sup>5</sup> Department of Pharmaceutical Engineering and Biotechnology, Sun Moon University, Asan 31460, Korea

<sup>†</sup>These authors contributed equally to this work.

#### \* To whom correspondence should be addressed:

Dr. Jun Hyuck Lee, Unit of Polar Genomics, Korea Polar Research Institute, Incheon 21990, Republic of Korea, Tel.: +82-32-760-5555; Fax: +82-32-760-5509; E-mail: junhyucklee@kopri.re.kr.

Prof. Tae-Jin Oh, Department of Pharmaceutical Engineering and Biotechnology, Sun Moon University, Asan 31460, Republic of Korea, Tel.: +82-41-530-2677; Fax: +82-41-530-2279; E-mail: tjoh3782@sunmoon.ac.kr.

**Keywords:**  $\alpha/\beta$ -ionone; crystal structure; cytochrome P450; X-ray crystallography

**Figure S1.** (A) SDS-PAGE analysis of purified CYP101D5 (lane 1, 45.97 kDa) and the redox partners PxR (lane 2, 58 kDa) and Pdx (lane 4, 10 kDa), where M is the standard protein marker with the size of the protein marker presented in kilodaltons (kDa). (B) Absorbance spectra of the carbon-monoxide-bound and dithionite reduced forms of CYP101D5.

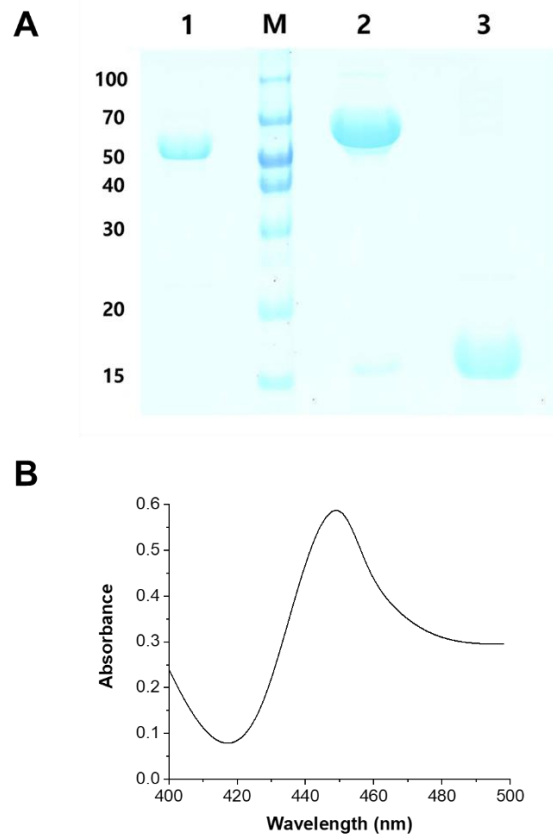

**Figure S2.** Gas chromatogram (GC) spectra of  $\beta$ -ionone conversion by CYP101D5. GC of (A) the control reaction and (B) reaction mixture. The peak ( $t_{RS} = 13.028$  min) is of  $\beta$ -ionone, and the product peak ( $t_{RP} = 14.134$  min) was identified as 4-hydroxy- $\beta$ -ionone. The structures of both the substrate and product are shown. (C) (D) The mass spectra of the peak and library hits for both the substrate and product are presented.

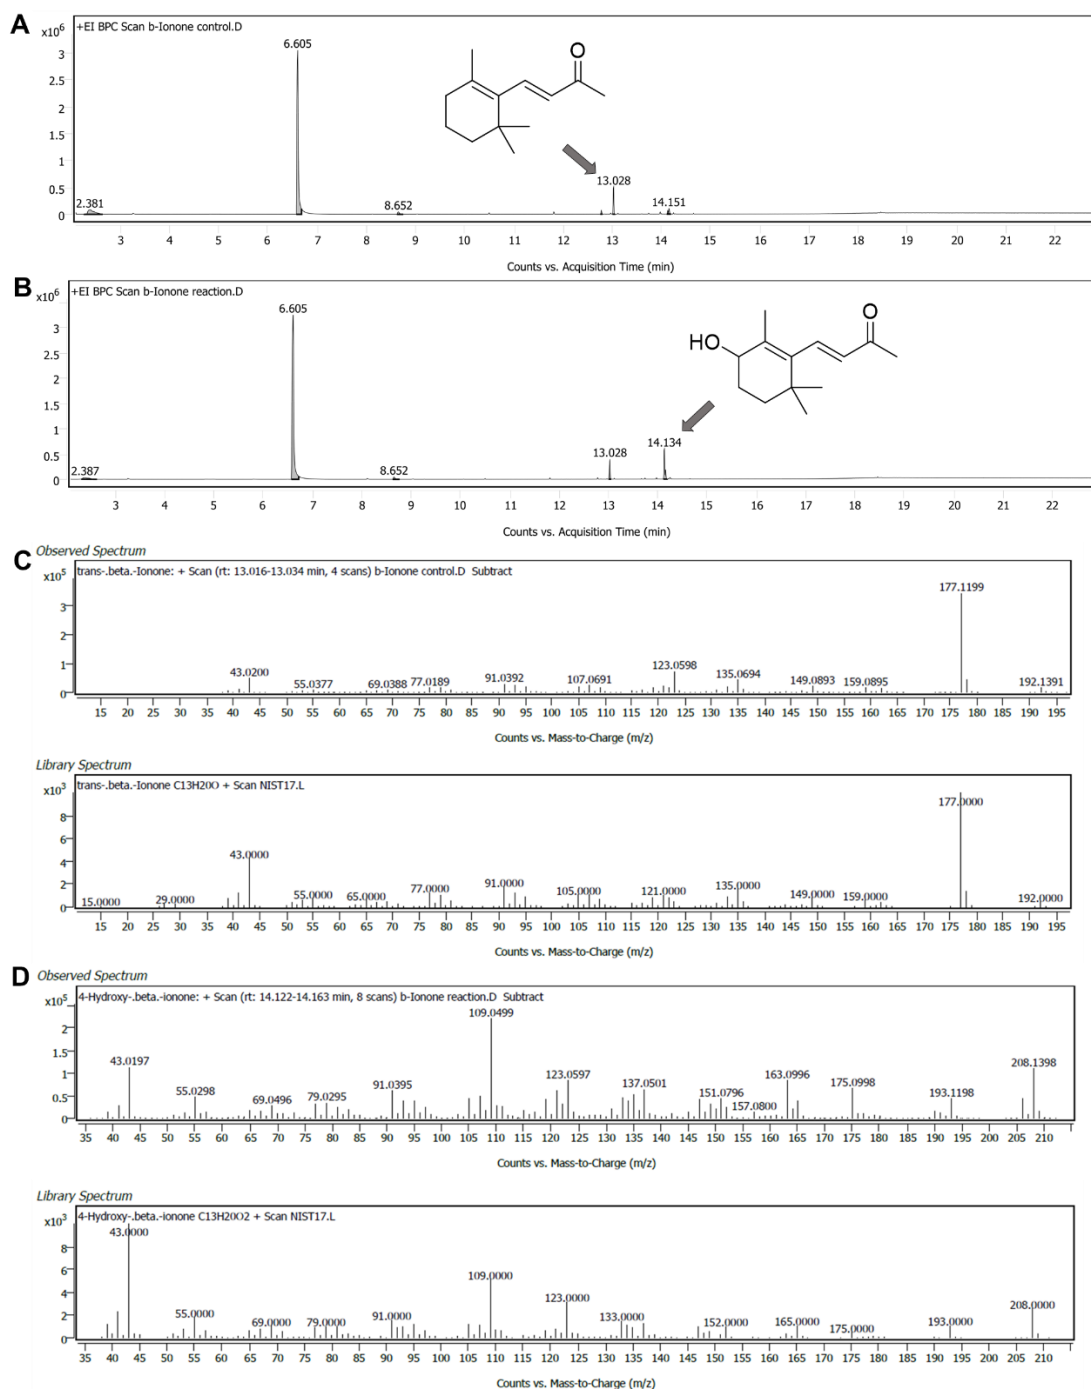

**Figure S3.** MS spectra of both the substrate ( $\alpha$ -ionone) (A) and product (2,3-dehydro- $\alpha$ -ionone) (B) peaks. The observed mass spectrum of the peak and library spectrum for both the substrate and product are presented.

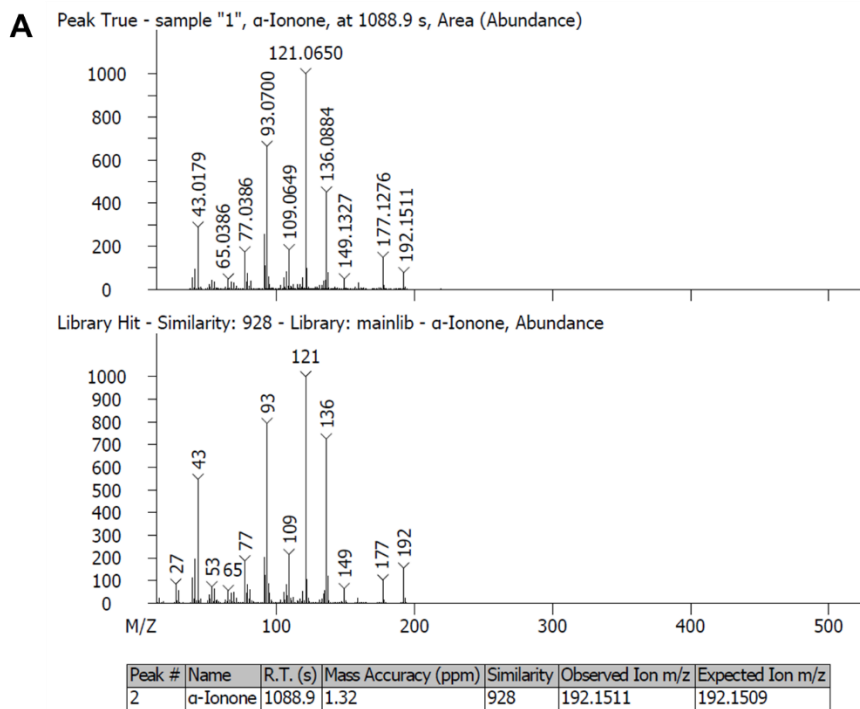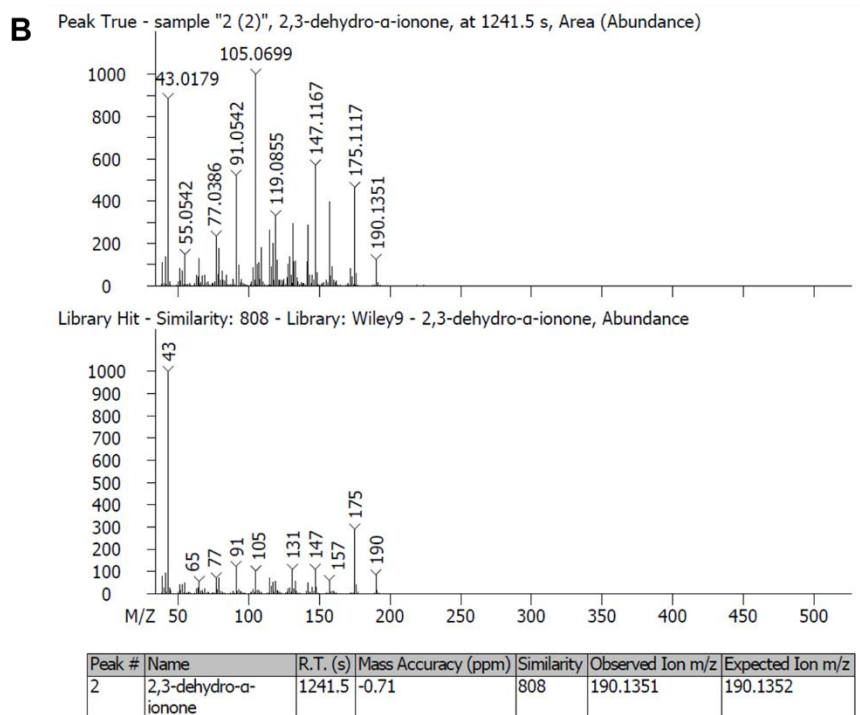

**Figure S4.** HPLC-PDA and HR-QTOF ESI/MS analyses of the reaction products. The product of naringenin (A) and apigenin (B) is denoted by P in their respective HPLC chromatograms. The mass spectra of the substrate and their corresponding hydroxylated product are also shown.

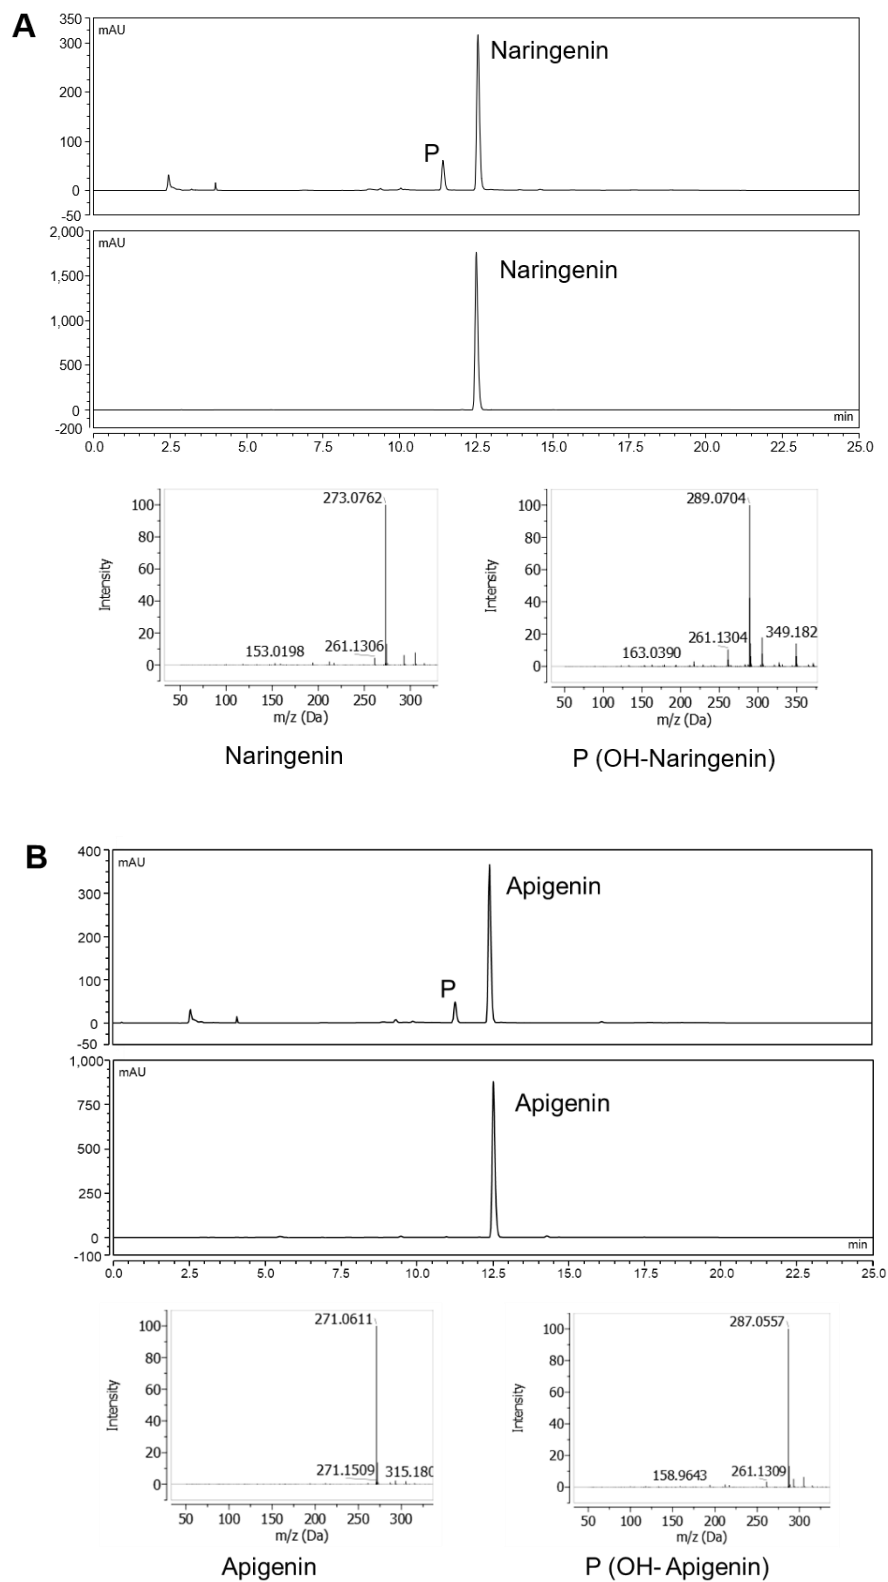

**Figure S5.**  $^1\text{H}$  and  $^{13}\text{C}$  NMR analyses of the hydroxylated product of naringenin (A) and apigenin (B).

**A**

$^1\text{H}$  OH-Naringenin DMSO

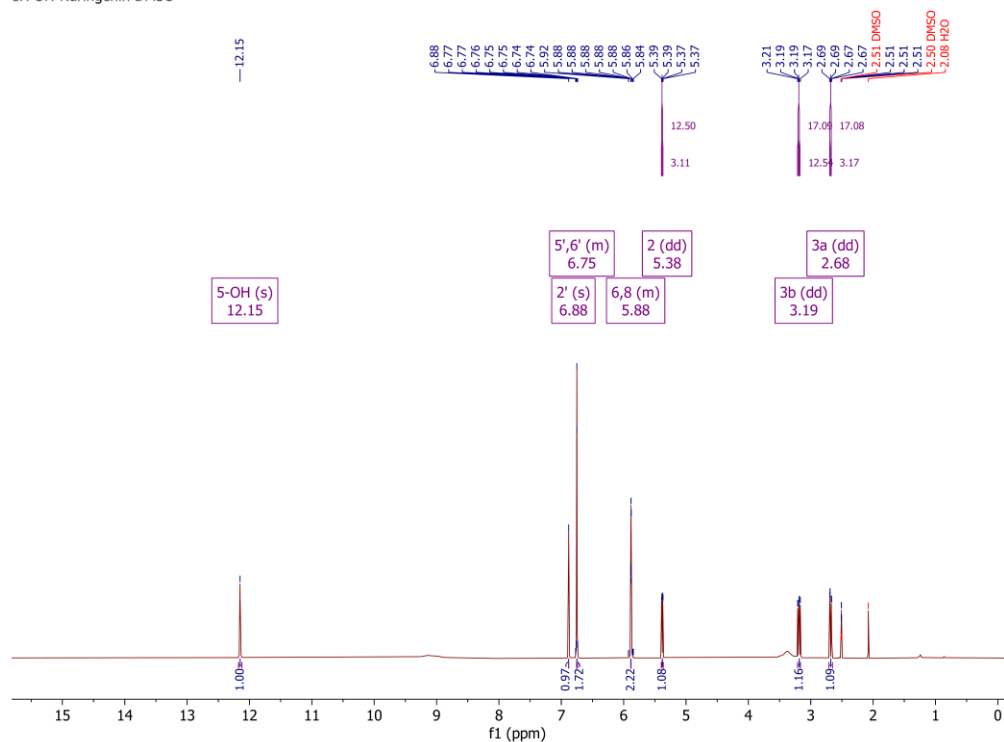

$^{13}\text{C}$  OH-Naringenin DMSO

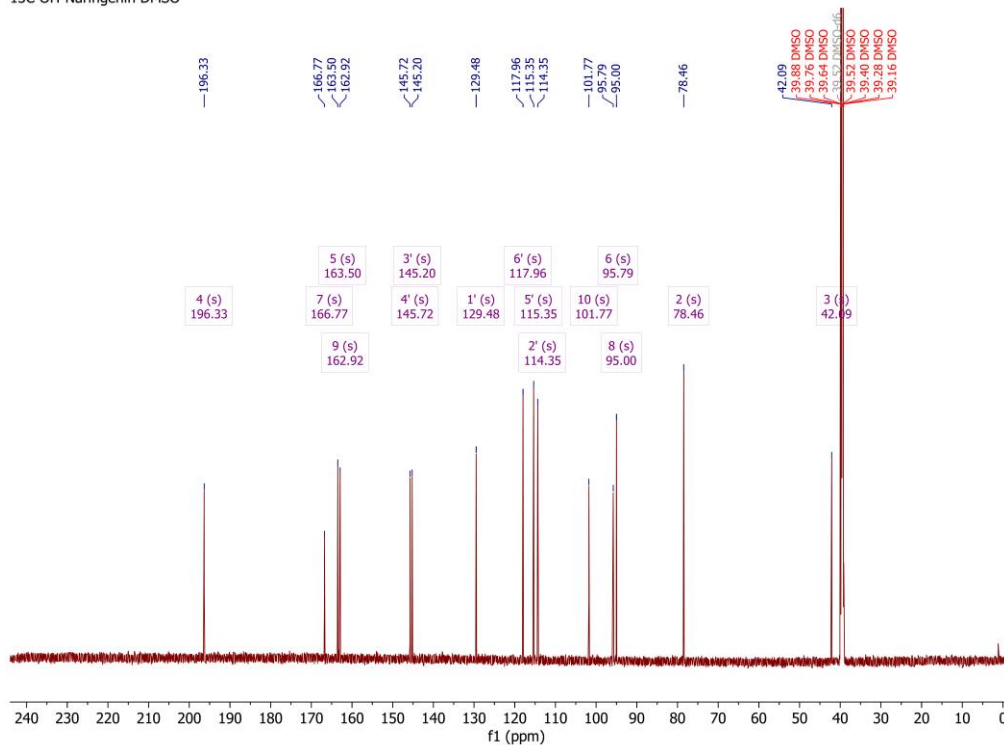

**B**

<sup>1</sup>H OH-Apigenin DMSO

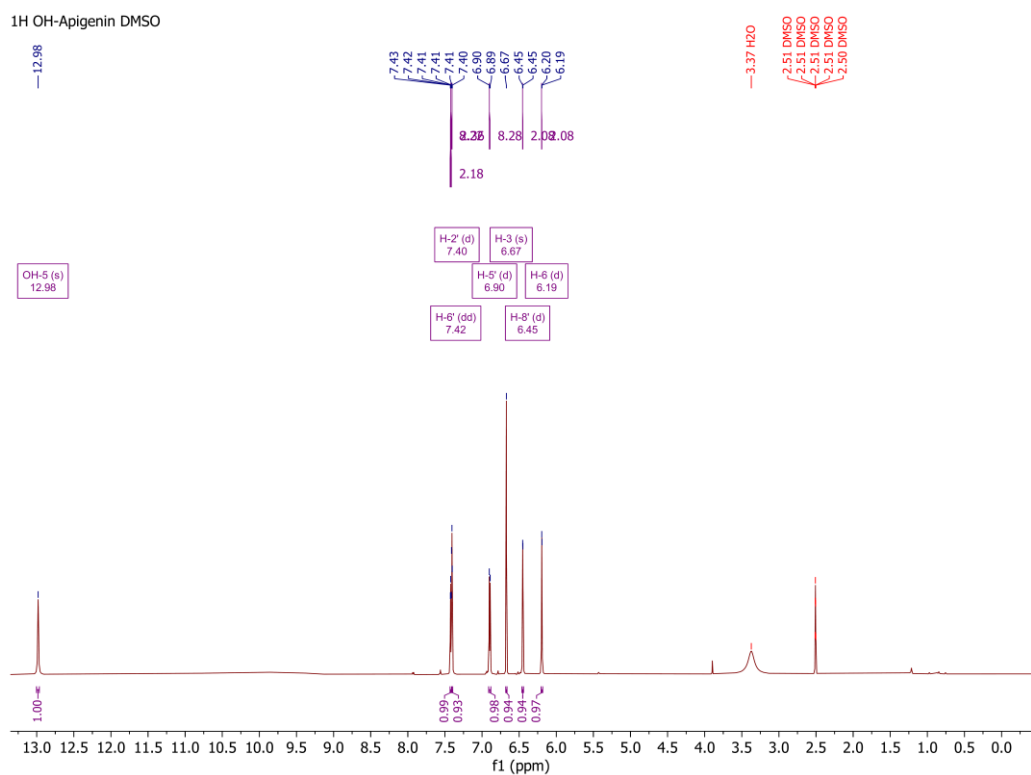

<sup>13</sup>C OH-Apigenin DMSO

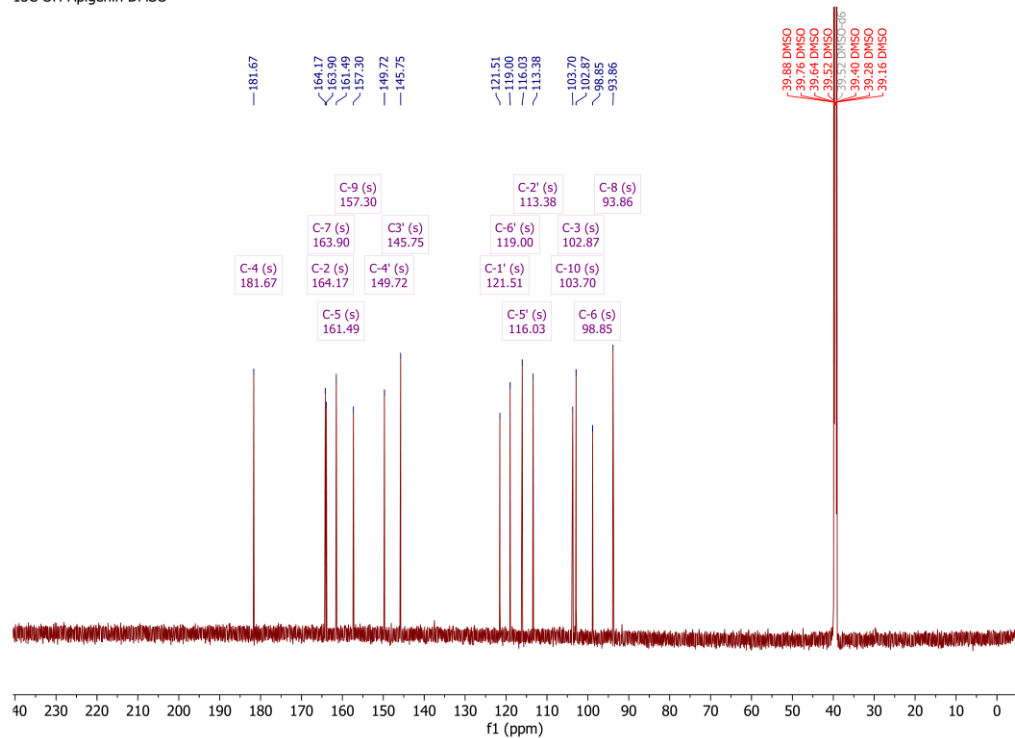

**Figure S6.** The  $\alpha K'$ - $\alpha L$  loops are mainly involved in the interaction with the heme molecule through a combination of hydrophobic and hydrogen bonds and salt bridges.

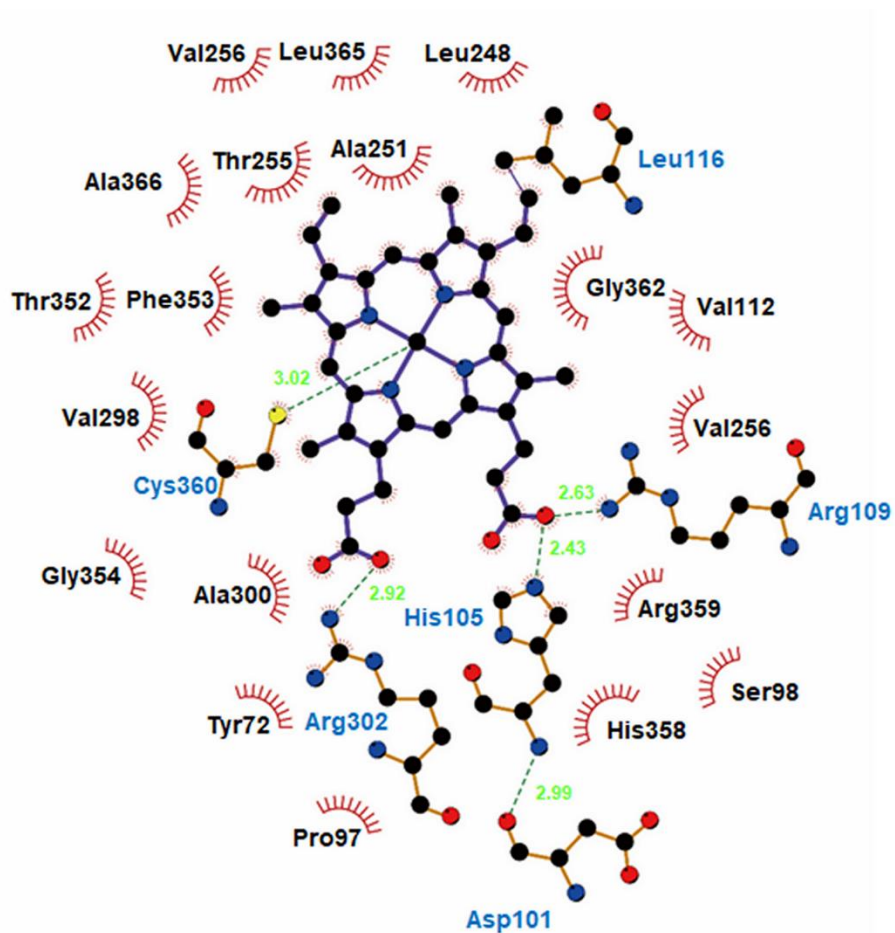



**Figure S7.** Conservation analysis of the protein sequence of CYP101D5 using ConSurf [35]. The conservation of the amino acids among the 400 CYP homologues are indicated using nine-grade color coding. The average scores of the edge B/C and F/G loops were 4.3 and 3.6, respectively.

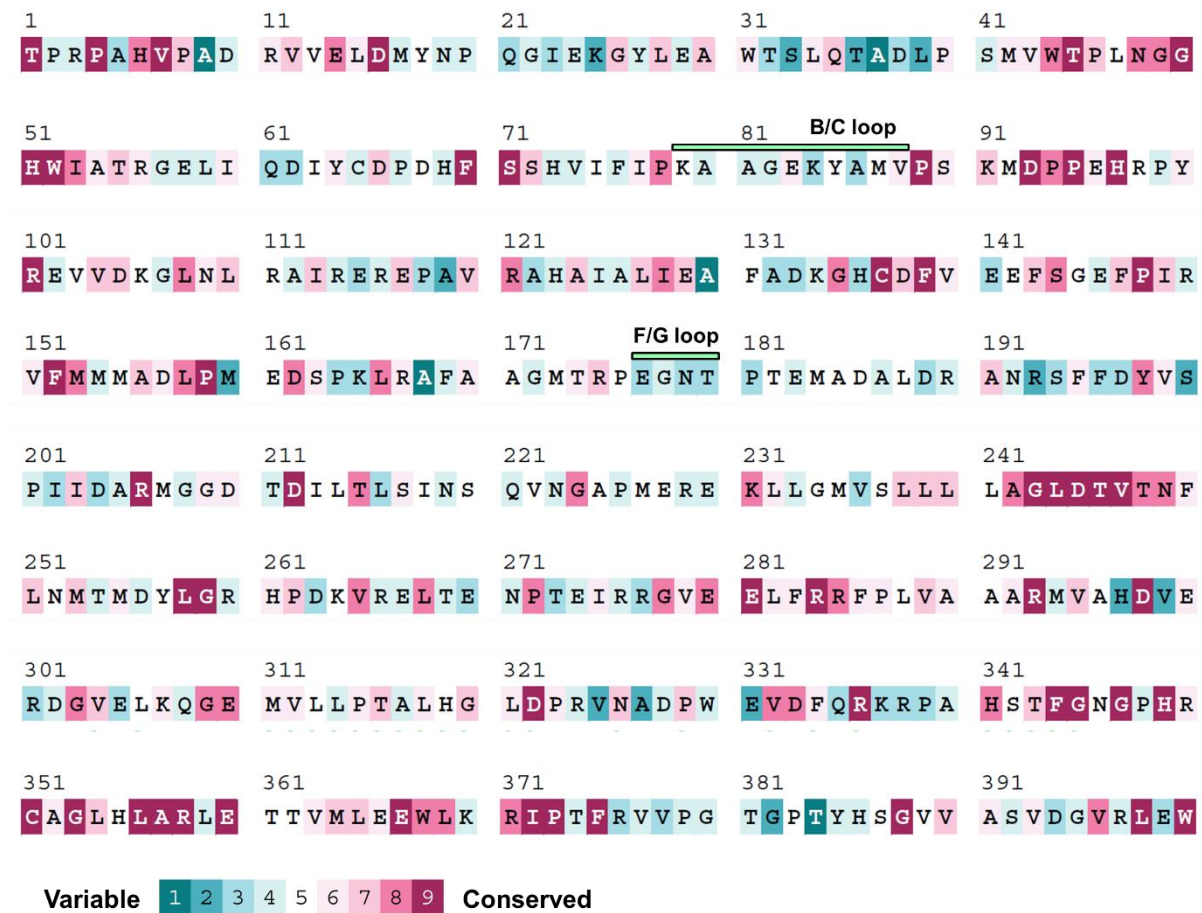

**Figure S8.** Substrate-dependent conformation of the B/C loop in the CYP101 family. Ionone-binding CYPs (A) and camphor-binding CYPs (B) were grouped and presented with different colors. The residues from the B/C loop comprising substrate binding sites are shown with sticks.

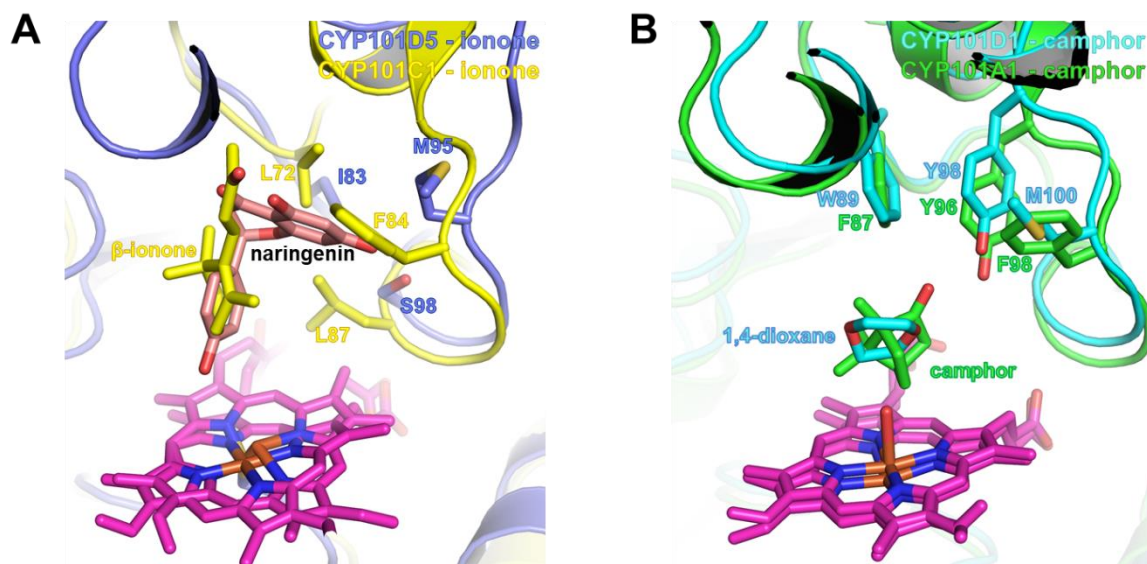

Supplement: s1 [file s1]
